# Supplementary material for: Multisensory synapses based on Fe3O4/graphene transistors for neuromorphic computing
Source: Royal Society of Chemistry journal article supplement (doi:10.1039/d3tc00687e), 2023-01-01
Supplement: d3tc00687e1.pdf [file d3tc00687e1.pdf]

## Supporting Information

Multisensory neurons based on Fe<sub>3</sub>O<sub>4</sub>/graphene transistors for neuromorphic computing

Tingting Miao,<sup>a</sup> Weikang Liu,<sup>a</sup> Cungang Huang,<sup>a</sup> Bin Cui,<sup>a,\*</sup> Ruiyue Chu,<sup>a</sup> Xiangxiang Zhao,<sup>a</sup>  
Xinyi Wu,<sup>a</sup> Shuyun Wu,<sup>a</sup> Jihao Xie,<sup>b</sup> Huiyang Liu,<sup>a</sup> Juan Chen,<sup>c</sup> Bin Cheng,<sup>a</sup> Jifan Hu<sup>a,\*</sup>

<sup>a</sup> School of Physics, State Key Laboratory for Crystal Materials, Shandong University, Jinan 250100, China.

<sup>b</sup> School of Science, Shandong Jianzhu University, Jinan 250101, China.

<sup>c</sup> The Fifth Research Institute of China Aerospace Science and Technology Corporation, Beijing 100000, China.

\* Authors to whom Correspondence should be addressed: bincui@sdu.edu.cn (Bin Cui);  
hujf@sdu.edu.cn (Jifan Hu).

Figure S1 shows that schematic diagram of Fe<sub>3</sub>O<sub>4</sub>/graphene device with ionic liquid (IL) electrolyte. The gate, source and drain electrodes are denoted as G, S and D, respectively. The conductance of the channel was measured between S and D electrodes with a two-probe configuration by Keithley 2400 source meter and the read voltage between the source and drain is 0.1 V. The gate voltage ( $V_G$ ) is applied between G and D and the leakage current ( $I_G$ ) is measured between G and D electrodes. Figure S2 shows that the  $I_G$  versus  $V_G$  curve, where  $I_G$  (on the order of  $10^{-11}$ – $10^{-8}$  A) is negligible compared with current in the channel current ( $I_{SD}$ ) (on the order of  $10^{-7}$ –

$10^{-6}$  A), suggesting that the leakage current cannot influence the measurement of channel conductance.

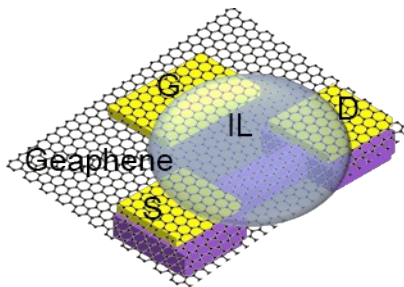

Figure S1 Schematic diagram of  $\text{Fe}_3\text{O}_4/\text{graphene}$  device with ionic liquid (IL) electrolyte.

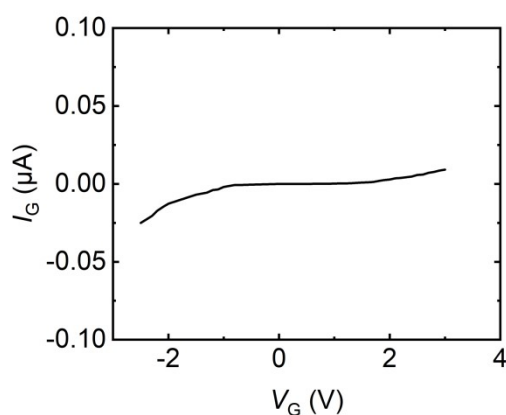

Figure S2 Gate voltage-dependent  $I_G$  curve during ion liquid gating in  $\text{Fe}_3\text{O}_4/\text{graphene}$  device.

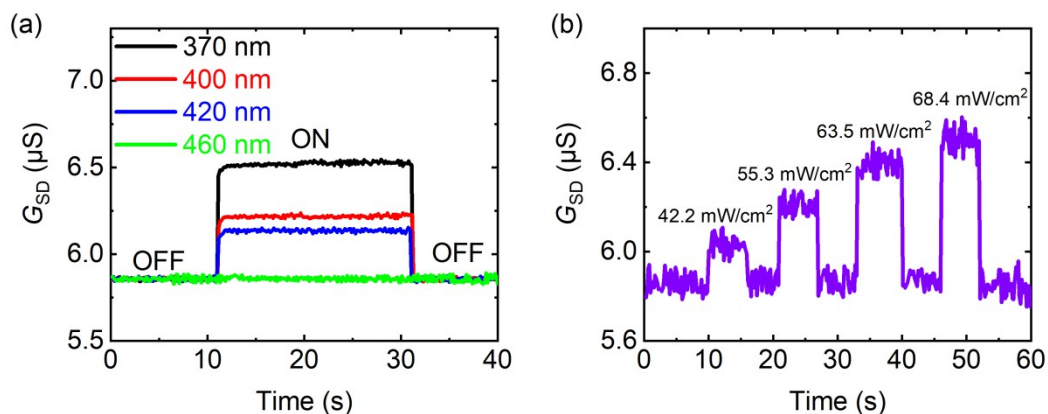

Figure S3 (a) The response of the channel conductance ( $\text{Fe}_3\text{O}_4/\text{graphene}$  transistor) under light illumination at various wavelengths. (b) The response of the channel conductance under various intensities of ultraviolet light (370 nm) illumination.

Figure S3(a) shows the modulations of the  $\text{Fe}_3\text{O}_4/\text{graphene}$  channel conductance under lights

with various wavelengths. The applications of lights at 370 nm, 400 nm, and 420 nm induce the increases of conductance from 5.86  $\mu\text{S}$  to 6.52  $\mu\text{S}$ , 6.21  $\mu\text{S}$ , and 6.14  $\mu\text{S}$ , respectively. But the light with larger wavelength (460 nm) cannot change the conductance obviously. Figure S3(b) shows the response of the channel conductance to ultraviolet light (UV, 370 nm) illuminations of various intensities. When the radiation intensity of UV light is 42.2  $\text{mW}/\text{cm}^2$ , 55.3  $\text{mW}/\text{cm}^2$ , 63.5  $\text{mW}/\text{cm}^2$ , and 68.4  $\text{mW}/\text{cm}^2$ , the channel conductance increases from 5.84  $\mu\text{S}$  to 6.03  $\mu\text{S}$ , 6.20  $\mu\text{S}$ , 6.40  $\mu\text{S}$ , and 6.49  $\mu\text{S}$ , respectively. In  $\text{Fe}_3\text{O}_4$ /graphene transistors, the enhancements of conductance induced by UV light illumination at different wavelengths and intensities are volatile, which can be used to simulate short-term plasticity of synapse.

Figure S4 modulations of the  $\text{Fe}_3\text{O}_4$  channel conductance under light illumination. Four samples are considered here: the first one is the  $\text{Fe}_3\text{O}_4$ , the second one is  $\text{Fe}_3\text{O}_4$  covered by graphene, the third is the  $\text{Fe}_3\text{O}_4$  covered by IL and graphene (sample used in the main text), and the fourth one is  $\text{Fe}_3\text{O}_4$  only covered by IL. All the samples show similar response to the light illumination, suggesting that the light induced conductance change is mainly contributed by  $\text{Fe}_3\text{O}_4$  layer rather than IL or graphene.

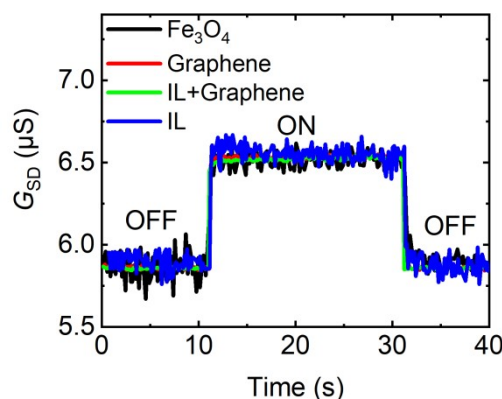

Figure S4 The response of the channel conductance under ultraviolet light (370 nm) illumination in  $\text{Fe}_3\text{O}_4$  transistor covered IL and graphene, either or neither of them.
